# Supplementary material for: Linkage Disequilibrium Decay and Past Population History in the Human Genome
Source: PubMed Central journal article supplement (PMC3462787; doi:10.1371/journal.pone.0046603), 2012-10-02

chr14  
65.6M 65.7M 65.8M 65.9M 66M 66.1M 66.2M 66.3M 66.4M 66.5M 66.6M 66.7M 66.8M 66.9M 67M 67.1M 67.2M 67.3M 67.4M

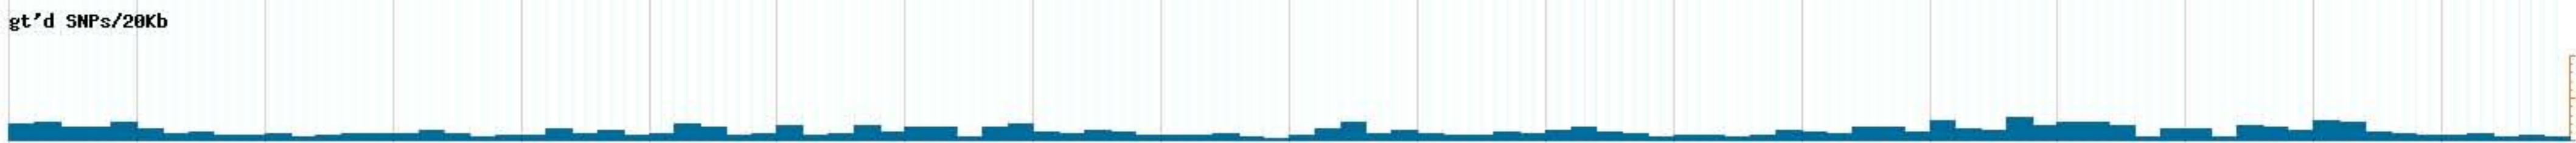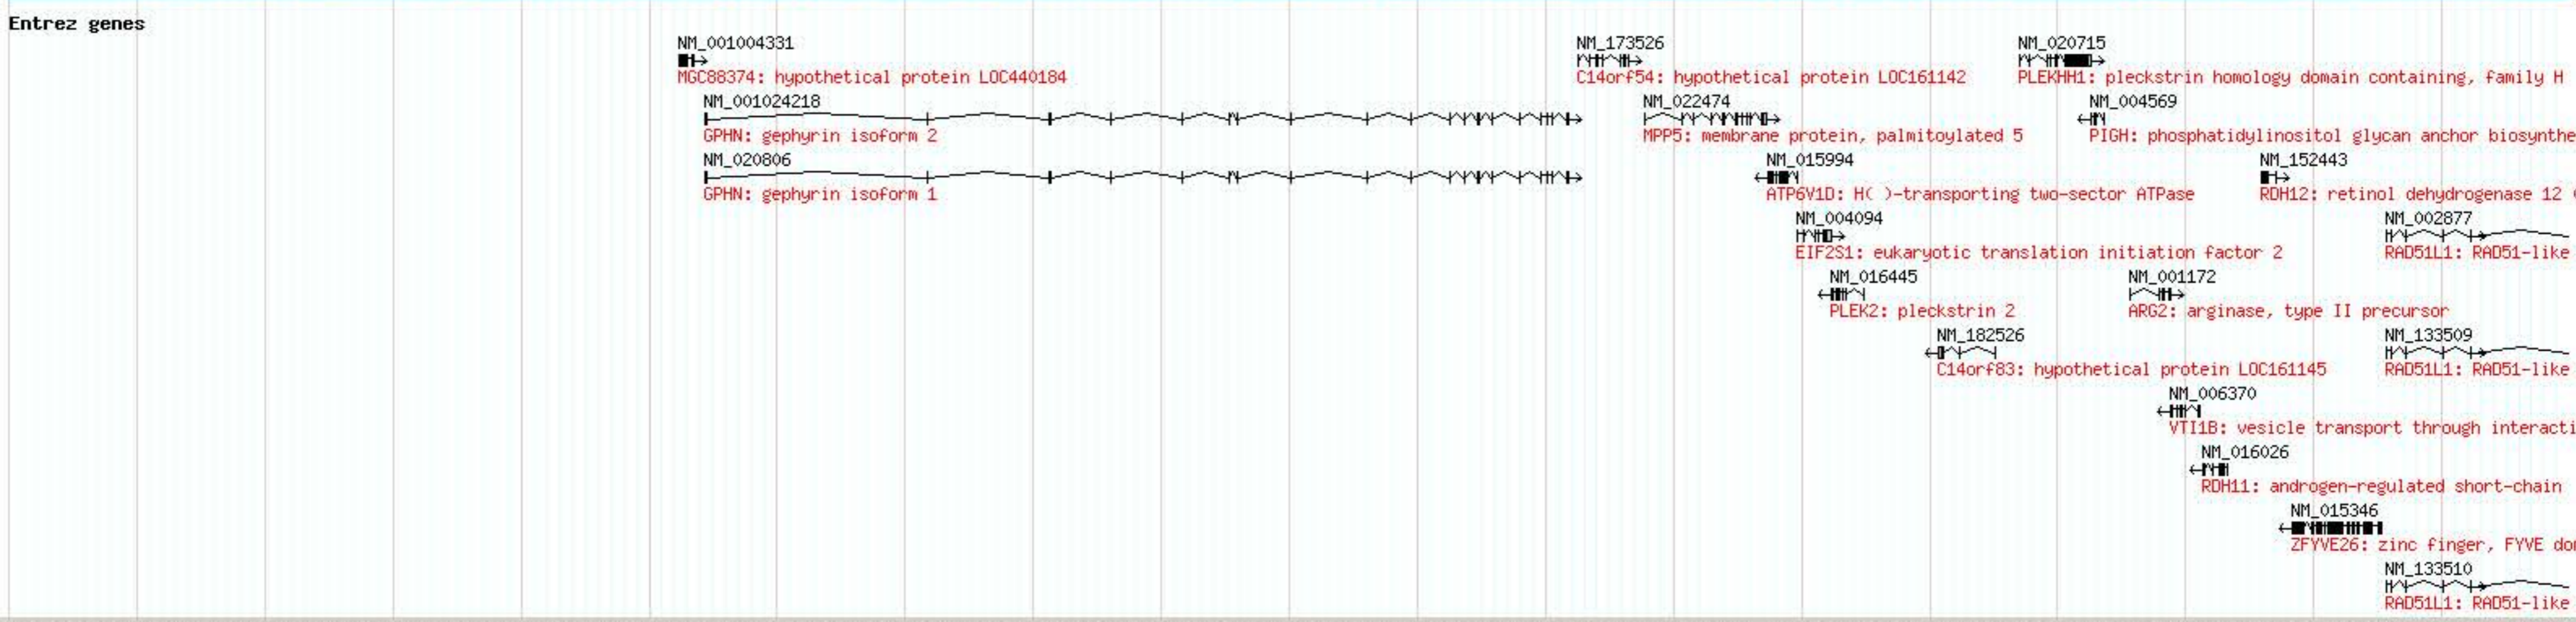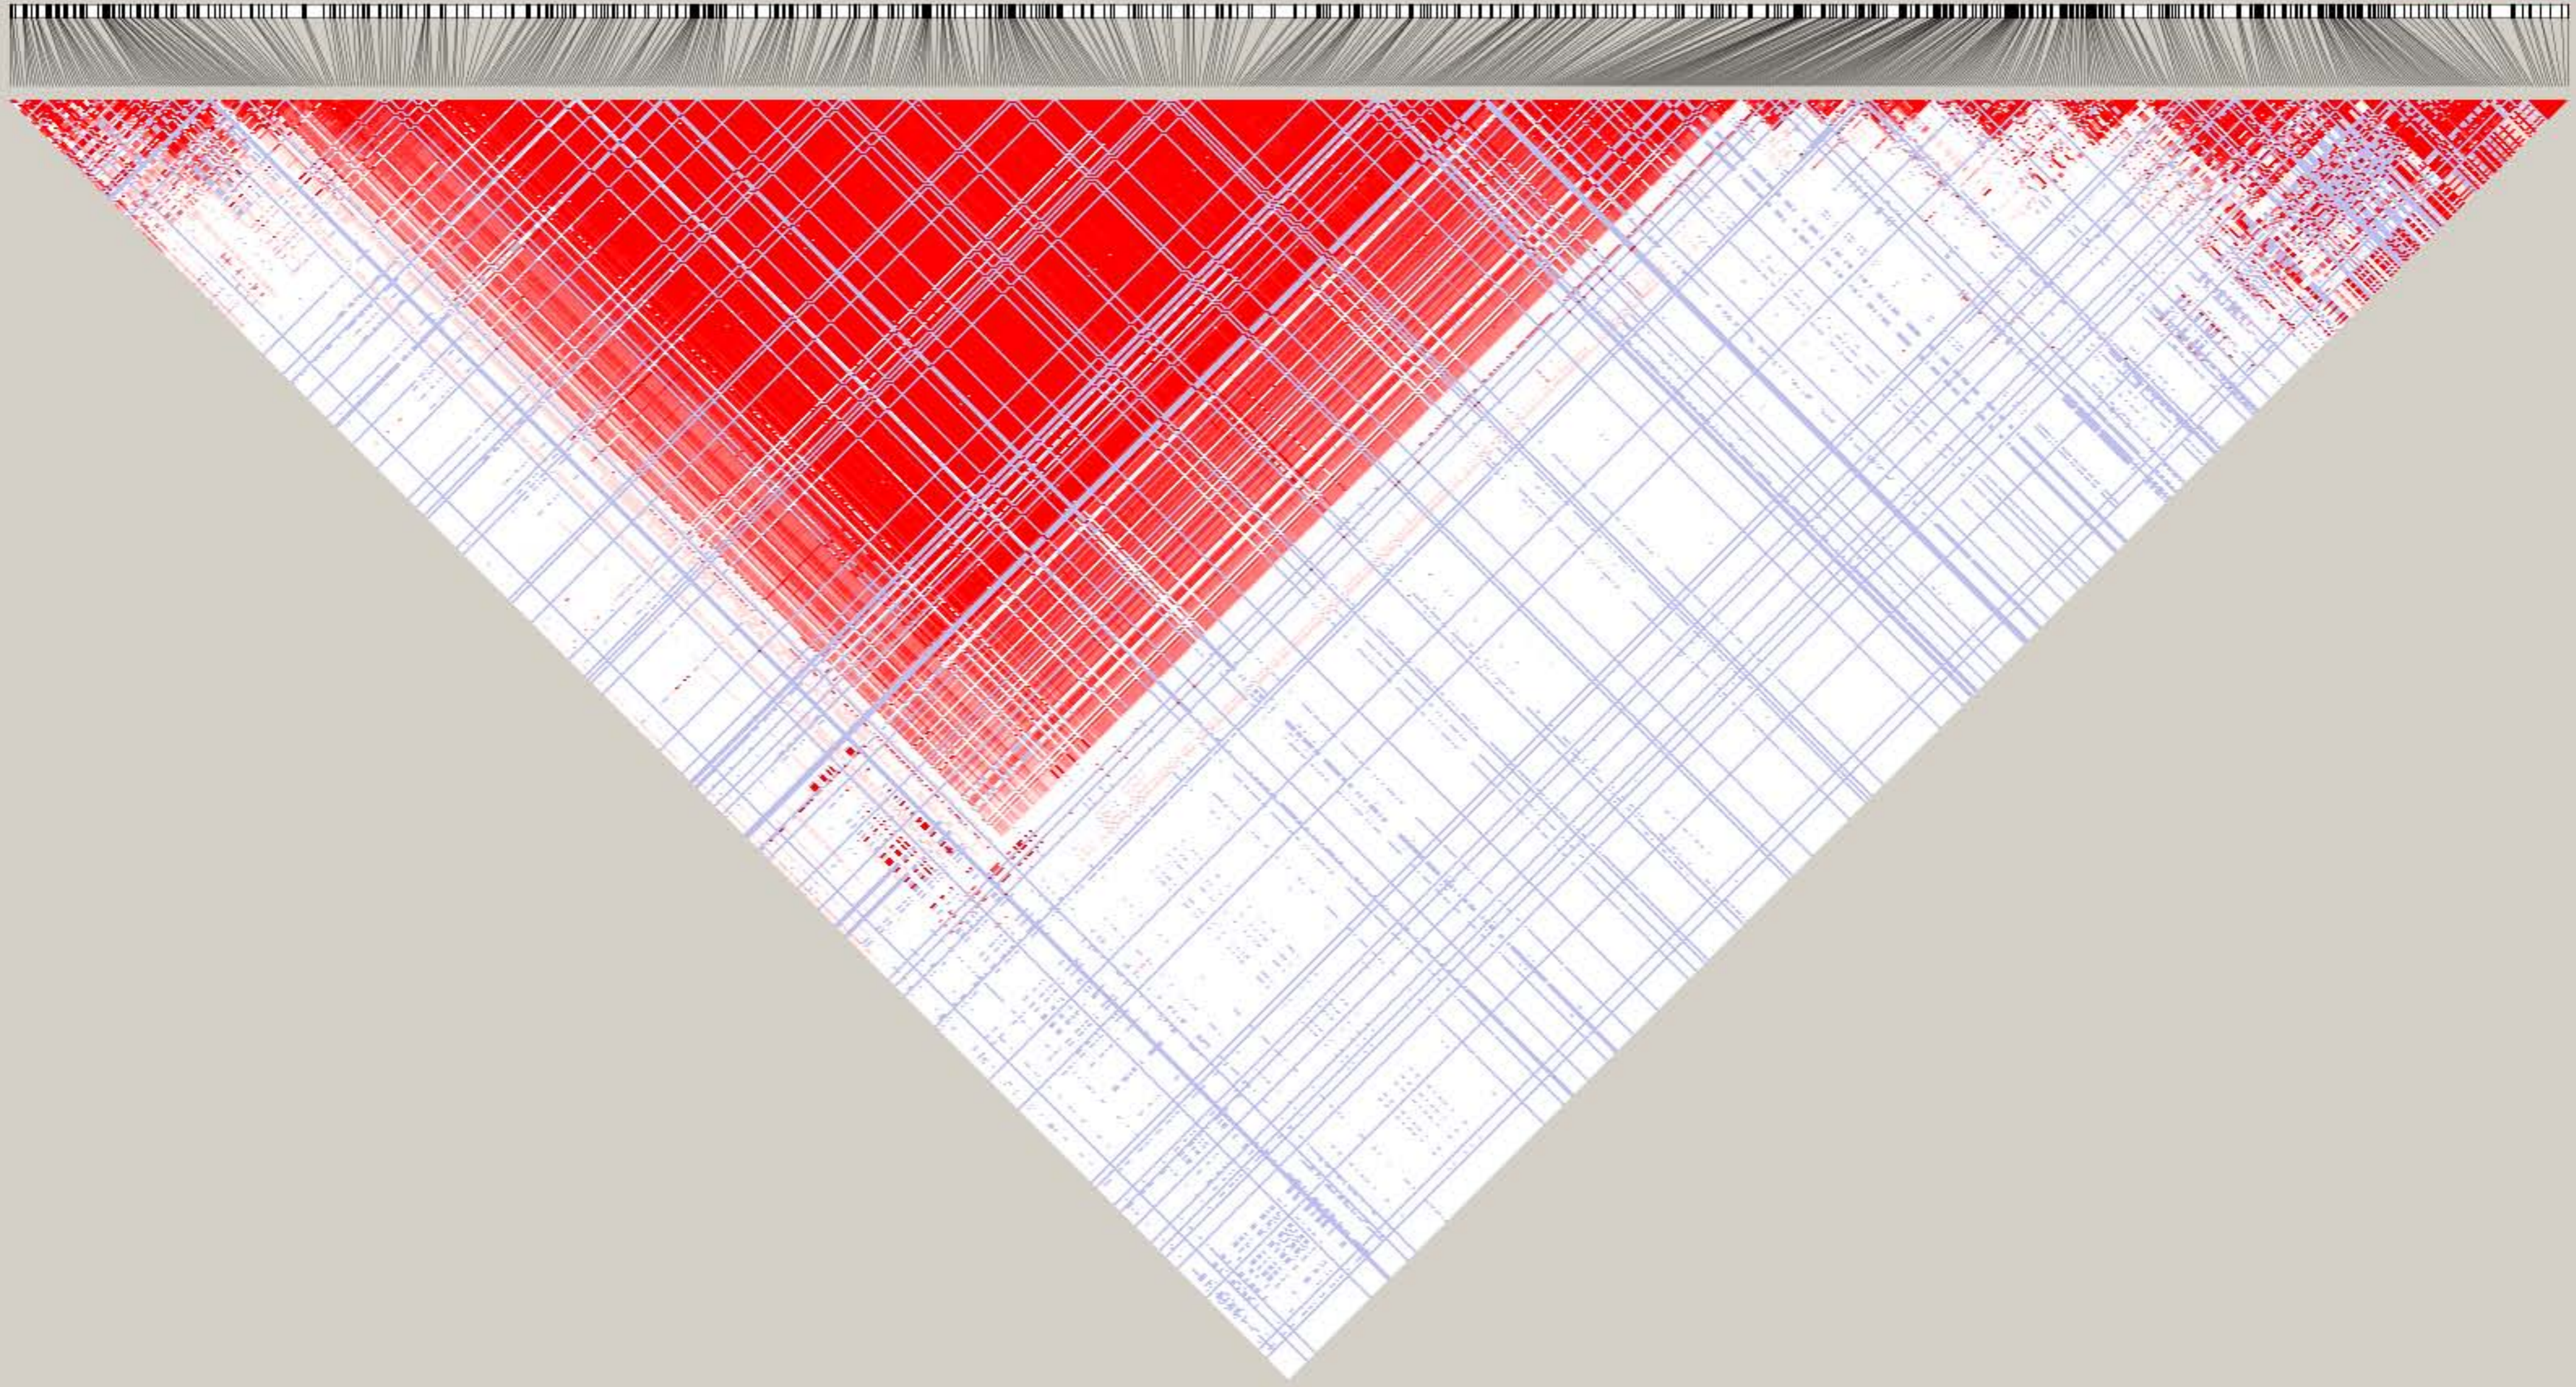

Supplement: pone.0046603.s002.pdf [file pone.0046603.s002.pdf]
