# Supplementary material for: Linkage Disequilibrium Decay and Past Population History in the Human Genome
Source: PubMed Central journal article supplement (PMC3462787; doi:10.1371/journal.pone.0046603), 2012-10-02

**ASW**

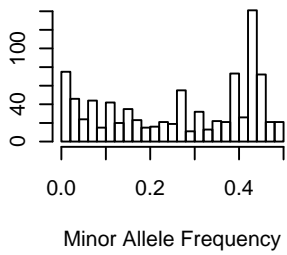

**CEU**

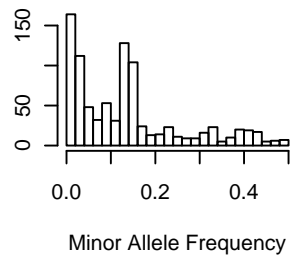

**CHB**

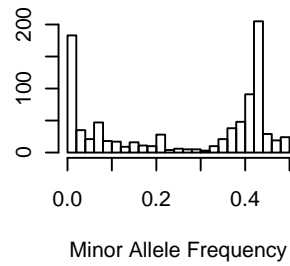

**CHD**

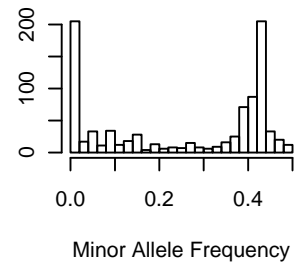

**GIH**

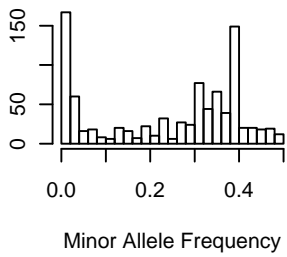

**JPT**

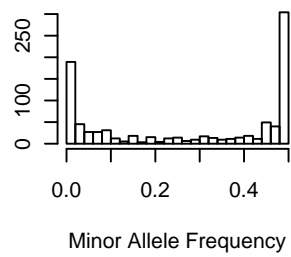

**LWK**

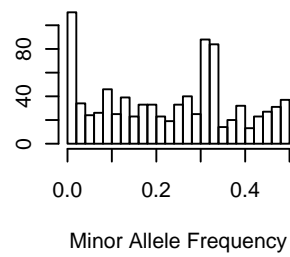

**MEX**

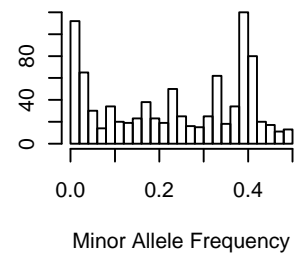

**MKK**

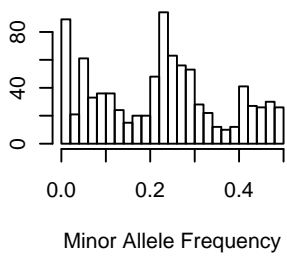

**TSI**

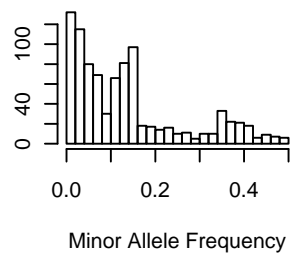

**YRI**

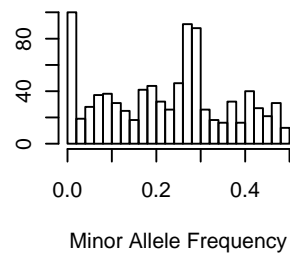

Supplement: pone.0046603.s003.pdf [file pone.0046603.s003.pdf]
