# Supplementary material for: Linkage Disequilibrium Decay and Past Population History in the Human Genome
Source: PubMed Central journal article supplement (PMC3462787; doi:10.1371/journal.pone.0046603), 2012-10-02

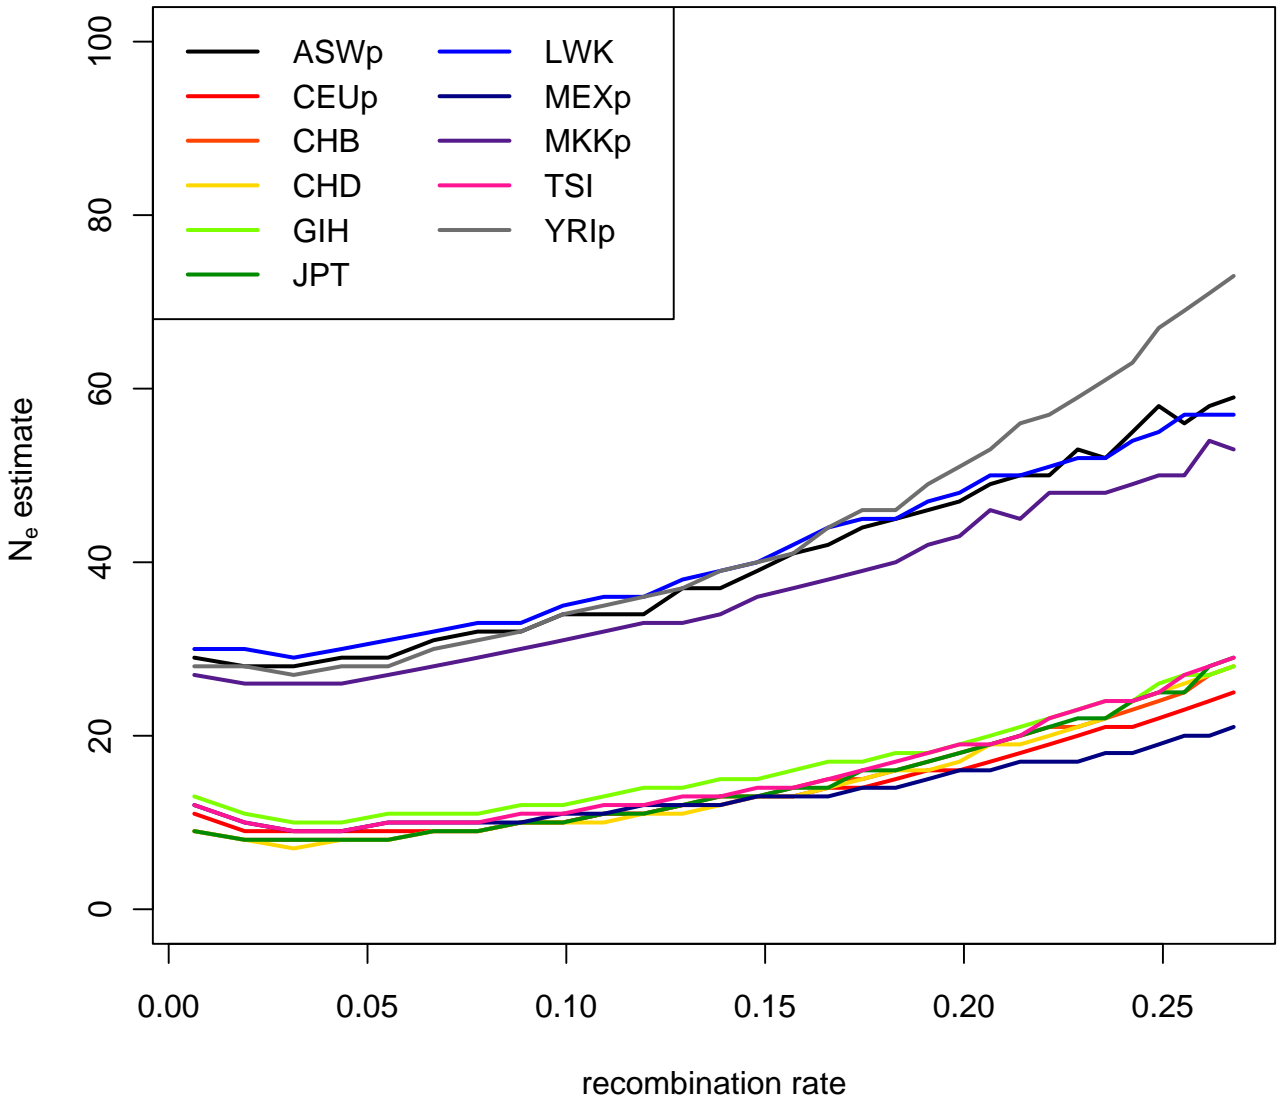

Supplement: pone.0046603.s004.pdf [file pone.0046603.s004.pdf]
