# Supplementary material for: Linkage Disequilibrium Decay and Past Population History in the Human Genome
Source: PLoS One. 2012 Oct 2;7(10):e46603. doi: 10.1371/journal.pone.0046603 (PMC3462787; doi:10.1371/journal.pone.0046603)
Supplement: Table S1 — Verification of Eq. 1 by simulations using extreme values. (XLSX) [file pone.0046603.s005.xlsx]

## Sheet: summary
Each simulated value was obtained from 10000 simulations.
Each simulation was conducted from a fixed r20 value for one generation.
r2: the squared LD at the current generation
r20: the squared LD at the previous generation
N0: effective population size at the previous generation
N1: effective population size at the current generation
c: recombination rate
r2 =	r20 *	(1-1/2/N1) *	(1-c/N0) *	(1-c)^2 +	c^2/2/N0 +	1/2/N1
Index:	1	2	3	4	5	6

## Sheet: 5
r20=0; N0=50; N1=100000
recombination rate	sim	expected	difference
0.5	0.00249	0.002505	-1.5e-05
0.4	0.00159	0.001605	-1.5e-05
0.3	0.000894	0.000905	-1.1e-05
0.2	0.000409	0.000405	4e-06
0.1	0.000104	0.000105	-1e-06
0.01	6.02e-06	6e-06	2e-08
0.001	4.92e-06	5.01e-06	-9e-08

## Sheet: 6
r20=0; N0=100000; c=0.0001
N1	sim	expected	difference
50	0.0101193	0.01	0.00011928
100	0.00498693	0.005	-1.3072e-05
200	0.00259707	0.0025	9.7071e-05
500	0.00099331	0.001	-6.6902e-06
1000	0.000500977	0.0005	9.767e-07

## Sheet: 2
r20=1; N0=100000; c=0.0001
N1	sim	expected	difference
20	0.999785	0.999805	-1.97088e-05
40	0.999817	0.999803	1.48911e-05
50	0.999718	0.999802	-8.36089e-05
100	0.999803	0.999801	1.99104e-06
200	0.999803	0.999801	2.99102e-06

## Sheet: 3
r20=1; N0=50; N1=100000
recombination rate	sim	expected	difference
0.5	0.249842	0.250004	-0.000162163
0.4	0.358409	0.358723	-0.000314114
0.3	0.488175	0.487963	0.000212335
0.2	0.637463	0.637842	-0.000379213
0.1	0.808752	0.808481	0.000270742
0.01	0.9799	0.979905	-5.38048e-06
0.001	0.997985	0.997981	4.13993e-06

## Sheet: 4
r20=1; N0=100000; N1=100000
recombination rate	sim	expected	difference
0.5	0.250005	0.250004	1.34999e-06
0.4	0.359962	0.360003	-4.086e-05
0.3	0.489986	0.490002	-1.583e-05
0.2	0.640017	0.640001	1.598e-05
0.1	0.810007	0.81	7.11e-06
0.01	0.980105	0.9801	5.49801e-06
0.001	0.997999	0.998001	-1.70002e-06

## Sheet: 1
N0=100000; N1=100000
simulation								expected
	r20								r20
recombination rate	1	0.64	0.36	0.16	0.04	0		recombination rate	1	0.64	0.36	0.16	0.04	0
0.5	0.250012	0.160038	0.089984	0.0400033	0.0100043	6.24737e-06		0.5	0.250004	0.160005	0.0900054	0.0400059	0.0100062	6.25e-06
0.4	0.359988	0.230371	0.12961	0.0576193	0.0144099	5.65306e-06		0.4	0.360003	0.230404	0.129605	0.0576053	0.0144057	5.8e-06
0.3	0.489997	0.313588	0.17641	0.0783968	0.0195944	5.34731e-06		0.3	0.490002	0.313603	0.176404	0.0784048	0.0196053	5.45e-06
0.2	0.64001	0.409614	0.23042	0.102397	0.0255934	5.20457e-06		0.2	0.640001	0.409602	0.230404	0.102404	0.025605	5.2e-06
0.1	0.810022	0.518467	0.291595	0.129596	0.0323983	4.98148e-06		0.1	0.81	0.518402	0.291603	0.129604	0.0324049	5.05e-06
0.01	0.98009	0.627273	0.352855	0.156832	0.0392172	5.03017e-06		0.01	0.9801	0.627266	0.352839	0.15682	0.0392088	5.0005e-06
0.001	0.998003	0.638733	0.359269	0.159693	0.0399352	5.01334e-06		0.001	0.998001	0.638722	0.359284	0.159684	0.0399248	5.00001e-06
difference
	r20
recombination rate	1	0.64	0.36	0.16	0.04	0
0.5	7.84999e-06	3.355e-05	-2.138e-05	-2.52e-06	-1.88e-06	-2.63e-09
0.4	-1.426e-05	-3.27264e-05	5.7664e-06	1.40484e-05	4.2696e-06	-1.46942e-07
0.3	-4.83001e-06	-1.48412e-05	6.1612e-06	-8.0128e-06	-1.08532e-05	-1.02694e-07
0.2	9.27999e-06	1.21672e-05	1.65128e-05	-7.3832e-06	-1.16008e-05	4.568e-09
0.1	2.221e-05	6.55604e-05	-8.2004e-06	-8.5724e-06	-6.5356e-06	-6.8519e-08
0.01	-1.0102e-05	6.79855e-06	1.6199e-05	1.15993e-05	8.42944e-06	2.9669e-08
0.001	1.69998e-06	1.076e-05	-1.446e-05	8.73999e-06	1.031e-05	1.3336e-08
